# Supplementary material for: A potential gliovascular mechanism for microglial activation: differential phenotypic switching of microglia by endothelium versus astrocytes
Source: Springer Nature journal article supplement (doi:10.1186/s12974-018-1189-2), 2018-05-15

Additional file 1: Figure S1: Cell viability of endothelial cells and astrocytes after OGD for 4 hrs and reoxygenation for 24 hrs.

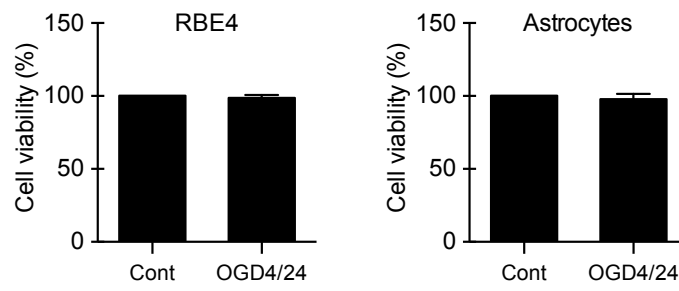

Supplement: MOESM1 [file 15765456]
