# Supplementary material for: A potential gliovascular mechanism for microglial activation: differential phenotypic switching of microglia by endothelium versus astrocytes
Source: Springer Nature journal article supplement (doi:10.1186/s12974-018-1189-2), 2018-05-15

Additional file 2: Figure S2: Levels of TNF $\alpha$ , IL-1 $\beta$ , IL-10 and IGF-1 in culture media from OGD-treated endothelial cells (Endo) or astrocytes (Astro) were measured using ELISA.

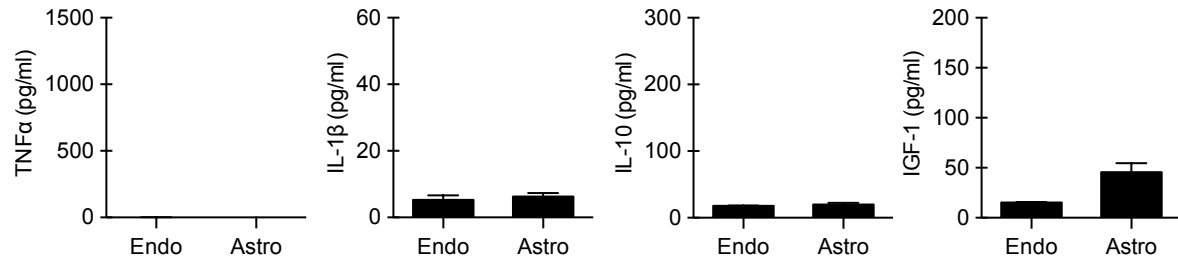

Supplement: MOESM2 [file 15765456]
