# Supplementary material for: A potential gliovascular mechanism for microglial activation: differential phenotypic switching of microglia by endothelium versus astrocytes
Source: Springer Nature journal article supplement (doi:10.1186/s12974-018-1189-2), 2018-05-15

Additional file 3: Figure S3: Gene expression of microglia sorted from ischemic brains by FACS was detected using real-time PCR at different time points after ischemia.

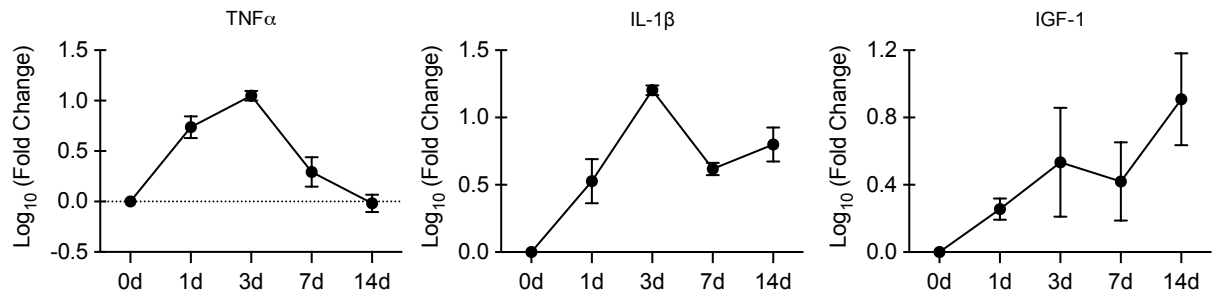

Supplement: MOESM3 [file 15765456]
