# Supplementary material for: A potential gliovascular mechanism for microglial activation: differential phenotypic switching of microglia by endothelium versus astrocytes
Source: Springer Nature journal article supplement (doi:10.1186/s12974-018-1189-2), 2018-05-15

Additional file 4: Figure S4: (a) IgG immunostaining of brain sections of rat transient MCAo models at 1, 3, and 7 days after ischemia. Data were expressed as mean $\pm$ SEM. \*,  $p < 0.05$  (one-way ANOVA). (b) GFAP immunostaining of brain sections of rat transient MCAo models at 1, 3, and 7 days after ischemia.

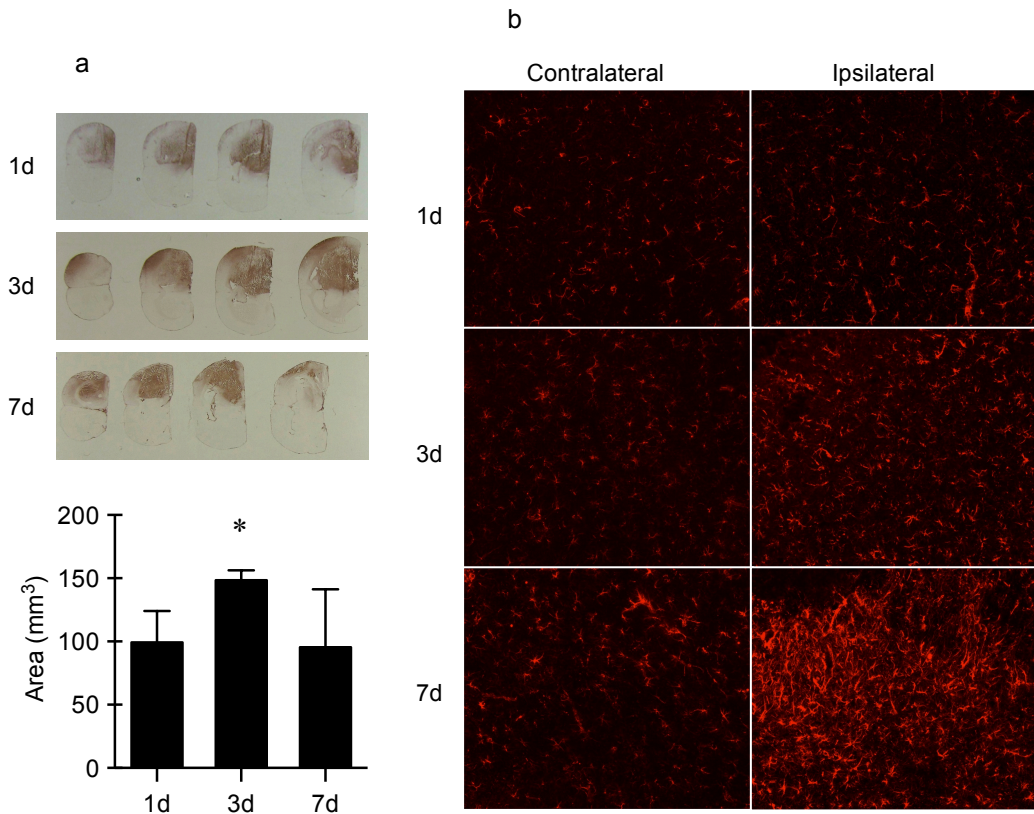

Supplement: MOESM4 [file 15765456]
