# Supplementary material for: A potential gliovascular mechanism for microglial activation: differential phenotypic switching of microglia by endothelium versus astrocytes
Source: Springer Nature journal article supplement (doi:10.1186/s12974-018-1189-2), 2018-05-15

Additional file 5: Figure S5: Gene expression and cytokine release from OGD-treated microglia. Microglia were subjected to OGD for 4 hrs and reoxygenation for 4 hrs (for gene expression detection using real time PCR) or 24 hrs (for cytokine release detection using ELISA). (a) The levels of iNOS, CD86, CD206, and arginase1 did not significantly changed in microglia after OGD treatment. (b) Compared with normoxic microglia, OGD treatment did not significantly changed the release of IGF-1, IL-10, IL-1 $\beta$ , and TNF $\alpha$  from microglia.

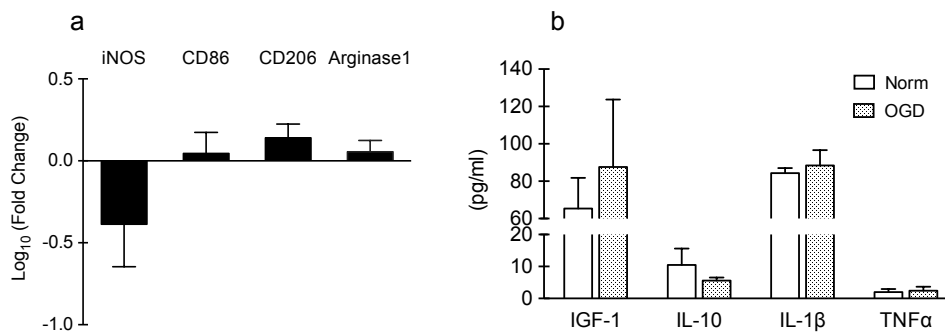

Supplement: MOESM5 [file 15765456]
