# Supplementary material for: A potential gliovascular mechanism for microglial activation: differential phenotypic switching of microglia by endothelium versus astrocytes
Source: Springer Nature journal article supplement (doi:10.1186/s12974-018-1189-2), 2018-05-15

Additional file 6: Figure S6: Microglia were subjected to OGD for 4 hrs, and then endo-CM or astro-CM were added into OGD-treated microglia for another 8 hrs (for gene expression experiment using real time PCR) or 24 hrs (for ELISA measurement of cytokines). (a) Endo-CM treatment upregulated the expression of iNOS, whereas astro-CM treatment upregulated the expression of CD206. (b, c) Endo-CM significantly increased the release of TNF $\alpha$  and IL-10 from OGD-treated microglia.

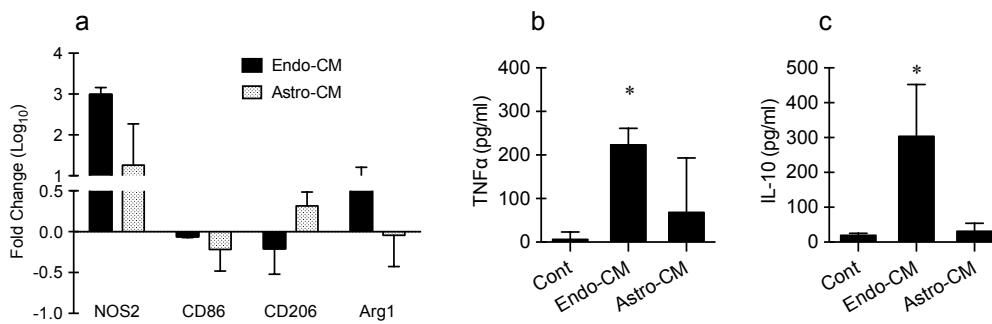

Supplement: MOESM6 [file 15765456]
